# Supplementary material for: Simulated Microgravity Inhibits the Proliferation of Chang Liver Cells by Attenuation of the Major Cell Cycle Regulators and Cytoskeletal Proteins
Source: MDPI journal article supplement (doi:10.3390/ijms22094550), 2021-04-27
Supplement: s1 [file s1]

## Supporting Information

### 1. Western blot

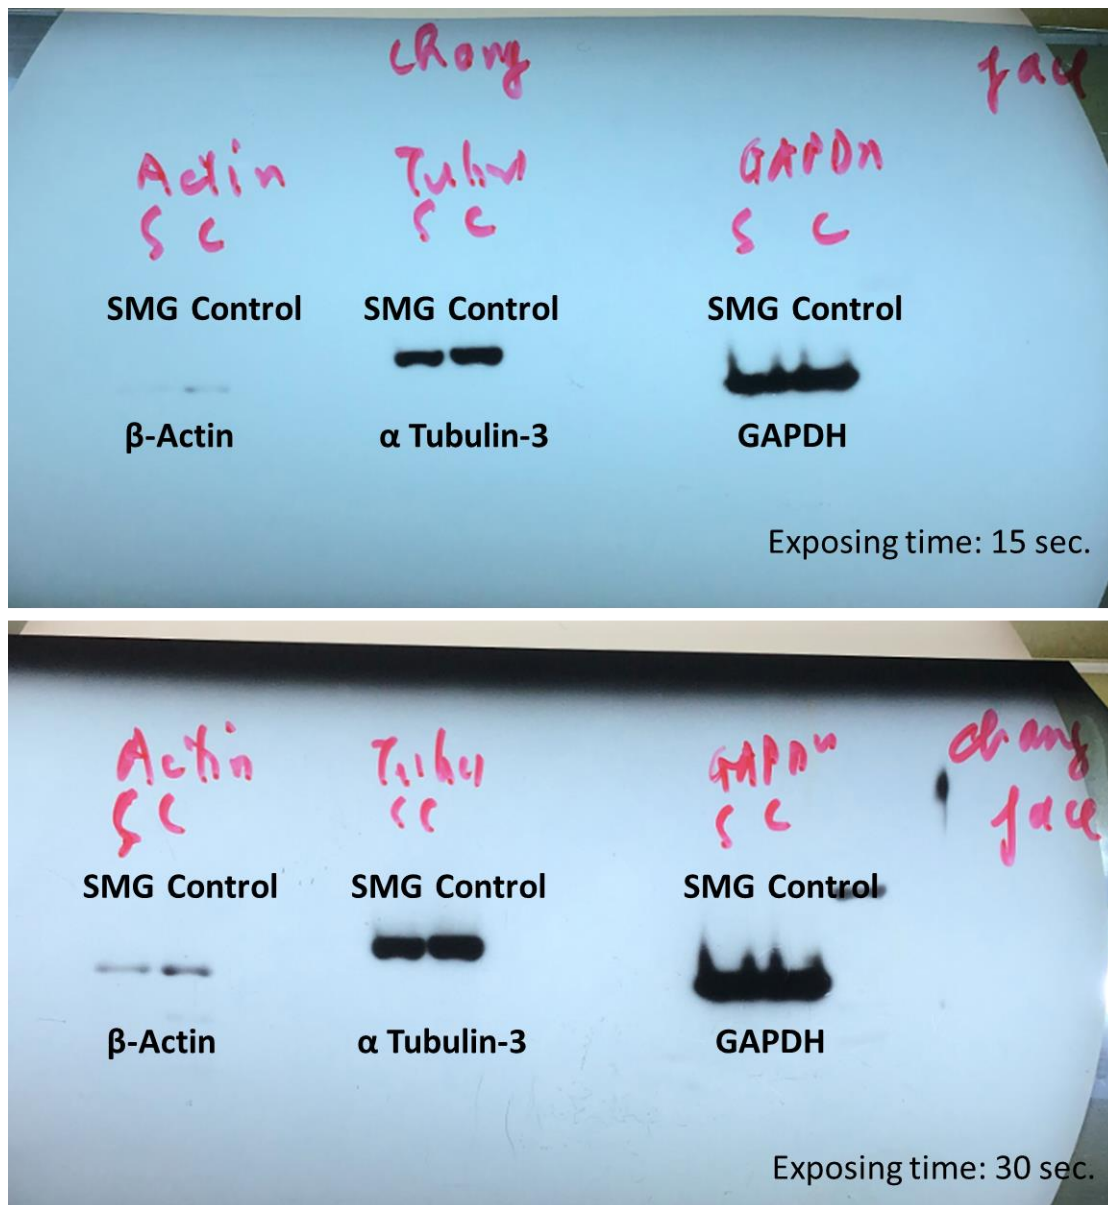

**Supplementary Figure S1.** X-ray film exposure of  $\beta$ -Actin,  $\alpha$ -Tubulin 3 and GAPDH.

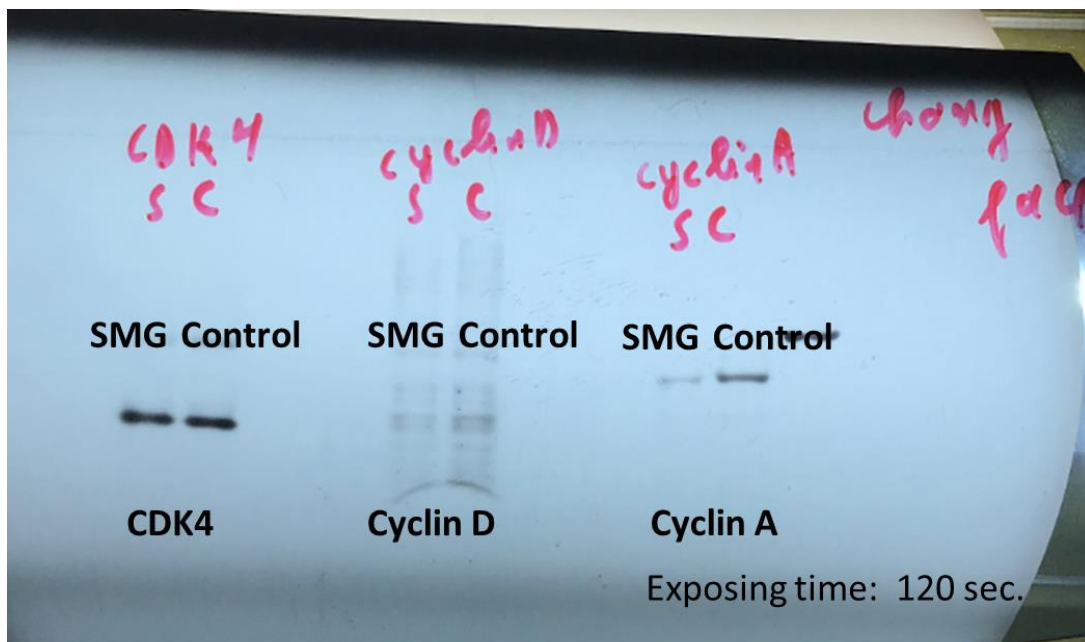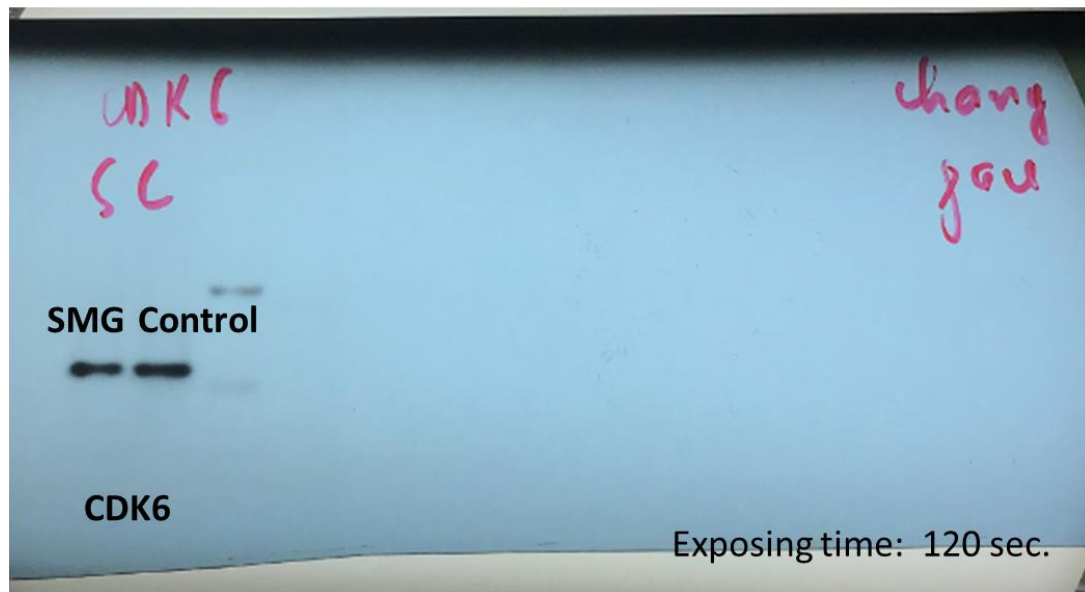

**Supplementary Figure S2.** X-ray film exposure of CDK4, Cyclin D, Cyclin A, CDK6.

## 2. 3D clinostat simulation

CCL-13 cells were cultured in T-25 flask. Flasks were filled with culture medium (Supplementary Figure S3A), and the filter-cap was slowly screwed to avoid the formation of bubbles (Supplementary Figure S3B). Flasks were fixed in stage of inner frame of 3D clinostat (Supplementary Figure S3C). 3D clinostat was located in the lower tray in CO<sub>2</sub> incubator, while flasks from the control group were put in the upper tray (Supplementary Figure S3D). Both frames of 3D clinostat rotate constantly with a speed of  $\sim 0.105$  rad/s and a maximum radius from the center of rotation of 0.05 m. The peak acceleration at the "worst location" of a sample is about  $1.3 \times 10^{-3}$  g. The control group was treated with 1 g. After 72 h, cells were immediately collected for the downstream experiments.

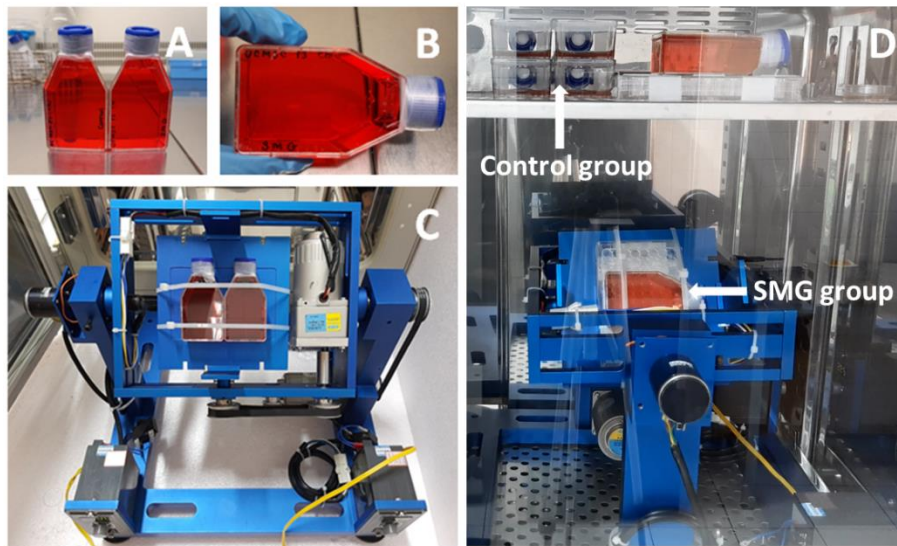

**Supplementary Figure S3.** The 3D clinostat preparation and operation. (A) T-25 flask was filled up medium and sealed by parafilm tape. (B) Bubbles checking in flask. (C). T-25 flasks were prepared in stage of 3D clinostat. (D) 3D clinostat operation in CO<sub>2</sub> incubator.

**Table S1. Cell number counting by Cell Cycle App. of Cytell Microscope.**

| <b>Well</b> | <b>Cell number/well</b> |            |
|-------------|-------------------------|------------|
|             | <b>Control</b>          | <b>SMG</b> |
| 1           | 8664                    | 6615       |
| 2           | 10565                   | 6981       |
| 3           | 9906                    | 6034       |
| 4           | 9947                    | 6333       |
| 5           | 9988                    | 8445       |
| 6           | 10378                   | 3340       |
| 7           | 9598                    | 6634       |
| 8           | 9791                    | 8382       |
| 9           | 10600                   | 7310       |
| 10          | 10308                   | 8310       |
| 11          | 10652                   | 8600       |
| 12          | 10810                   | 8117       |

**Table S2. WST-1 assay of Chang liver cells.**

| <b>Well</b> | <b>O.D. value measurement</b> |            |
|-------------|-------------------------------|------------|
|             | <b>Control</b>                | <b>SMG</b> |
| 1           | 7.72E-01                      | 6.37E-01   |
| 2           | 7.48E-01                      | 7.88E-01   |
| 3           | 7.62E-01                      | 7.41E-01   |
| 4           | 7.58E-01                      | 6.05E-01   |
| 5           | 7.78E-01                      | 5.71E-01   |
| 6           | 7.46E-01                      | 6.09E-01   |
| 7           | 7.80E-01                      | 5.83E-01   |
| 8           | 7.41E-01                      | 6.73E-01   |
| 9           | 7.42E-01                      | 5.70E-01   |
| 10          | 7.50E-01                      | 6.50E-01   |
| 11          | 7.41E-01                      | 5.65E-01   |
| 12          | 8.11E-01                      | 4.37E-01   |

**Table S3. Cell cycle analysis (by Flow cytometry).**

| Group   | No. | Cell cycle progression |       |          |
|---------|-----|------------------------|-------|----------|
|         |     | G0/G1 (%)              | S (%) | G2/M (%) |
| Control | 1   | 86.30                  | 11.90 | 1.00     |
|         | 2   | 87.10                  | 11.10 | 0.90     |
|         | 3   | 86.90                  | 11.40 | 1.00     |
|         | 4   | 87.40                  | 10.80 | 1.00     |
| SMG     | 1   | 91.70                  | 6.30  | 0.60     |
|         | 2   | 90.70                  | 7.00  | 0.70     |
|         | 3   | 90.00                  | 7.90  | 0.60     |
|         | 4   | 90.00                  | 7.50  | 0.80     |

**Table S4. Apoptosis analysis (by Flow cytometry).**

| Group   | No. |          |           |                 |                |
|---------|-----|----------|-----------|-----------------|----------------|
|         |     | Necrosis | Viability | Early apoptosis | Late apoptosis |
| Control | 1   | 0.4      | 98.8      | 0.4             | 0.4            |
|         | 2   | 0.4      | 98.9      | 0.4             | 0.4            |
|         | 3   | 0.3      | 98.9      | 0.3             | 0.4            |
|         | 4   | 0.4      | 98.7      | 0.3             | 0.3            |
| SMG     | 1   | 0.1      | 99.1      | 0.5             | 0.3            |
|         | 2   | 0.2      | 99.0      | 0.4             | 0.4            |
|         | 3   | 0.2      | 99.0      | 0.4             | 0.3            |
|         | 4   | 0.2      | 99.2      | 0.3             | 0.2            |

**Table S5. FSC value (x 10<sup>6</sup>).**

| <b>No.</b> | <b>Control</b> | <b>SMG</b> |
|------------|----------------|------------|
| 1          | 8.98           | 9.99       |
| 2          | 8.83           | 9.91       |
| 3          | 8.78           | 9.81       |
| 4          | 8.66           | 9.71       |
| 5          | 8.66           | 9.58       |



**Table S6. Measurement of nuclear area.**

| <b>Well</b> | <b>Nuclear area (<math>\mu\text{m}^2</math>)</b> |            |
|-------------|--------------------------------------------------|------------|
|             | <b>Control</b>                                   | <b>SMG</b> |
| 1           | 246                                              | 231        |
| 2           | 253                                              | 234        |
| 3           | 252                                              | 234        |
| 4           | 253                                              | 239        |
| 5           | 258                                              | 242        |
| 6           | 263                                              | 254        |
| 7           | 253                                              | 254        |
| 8           | 253                                              | 248        |
| 9           | 255                                              | 257        |
| 10          | 254                                              | 251        |
| 11          | 264                                              | 255        |
| 12          | 253                                              | 235        |

**Table S7. Measurement of nuclear shape value.**

| Well | Nuclear shape value |      |
|------|---------------------|------|
|      | Control             | SMG  |
| 1    | 0.87                | 0.89 |
| 2    | 0.86                | 0.88 |
| 3    | 0.89                | 0.87 |
| 4    | 0.88                | 0.86 |
| 5    | 0.88                | 0.88 |
| 6    | 0.86                | 0.83 |
| 7    | 0.88                | 0.87 |
| 8    | 0.87                | 0.87 |
| 9    | 0.88                | 0.88 |
| 10   | 0.87                | 0.86 |
| 11   | 0.86                | 0.88 |
| 12   | 0.88                | 0.89 |
